# Supplementary material
Source: PubMed Central journal article supplement (PMC2788309)

## Outer Segment Oligomerization of Rds-Supporting Information

Supplementary Figure 1: Sedimentation profile of standard protein markers. NEM-treated, Triton X-100-solubilized standard molecular weight markers (apoferritin, beta amylase, alcohol dehydrogenase, bovine serum albumin and carbonic anhydrase) were sedimented on 5-20% sucrose gradients; fractionated gradients were assayed in SDS-PAGE under reducing conditions. The Coomassie Brilliant Blue stained gel (A) and the corresponding plots (B) generated by image analysis are shown.

Supplementary Figure 2: Characterization of OS-enriched and OS-depleted preparations. Western blot probed with anti-rhodopsin (MAb 1D4) and anti-GARP-4B1 shows ample rhodopsin and GARP respectively in the OS-enriched sample, but very little in the OS-depleted sample. The  $\alpha 3$  isoform of  $\text{Na}^+/\text{K}^+$ -ATPase (an IS plasma membrane marker) was mainly found in the OS-depleted extract, with none in the OS-enriched extract. Similarly, anti-calreticulin is an endoplasmic reticulum marker and showed its immunoreactivity in OS-depleted preparation. Each OS-enriched and OS-depleted sample was evaluated for contaminants from the other compartment before use for the sedimentation experiment.

Supplementary Figure 1  
Chakraborty et al.

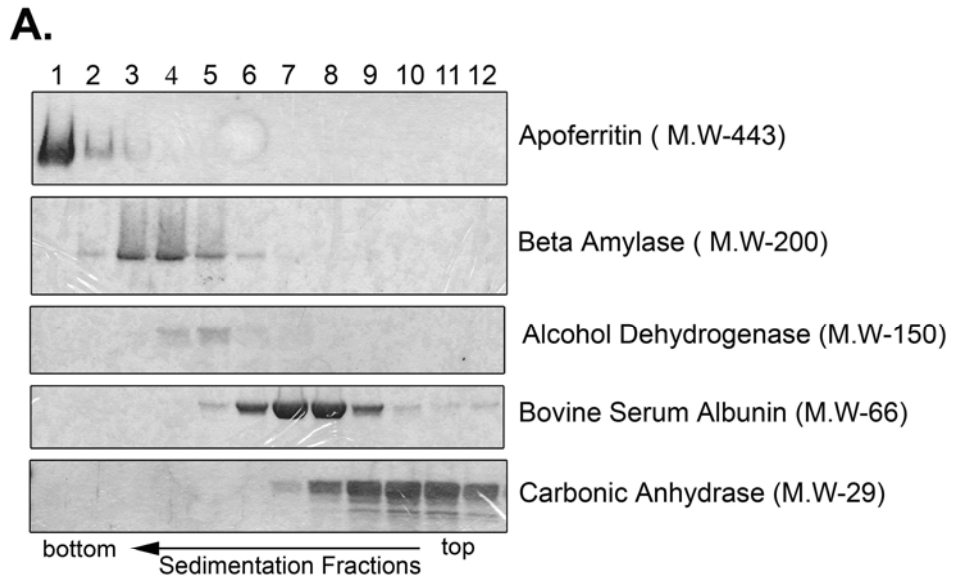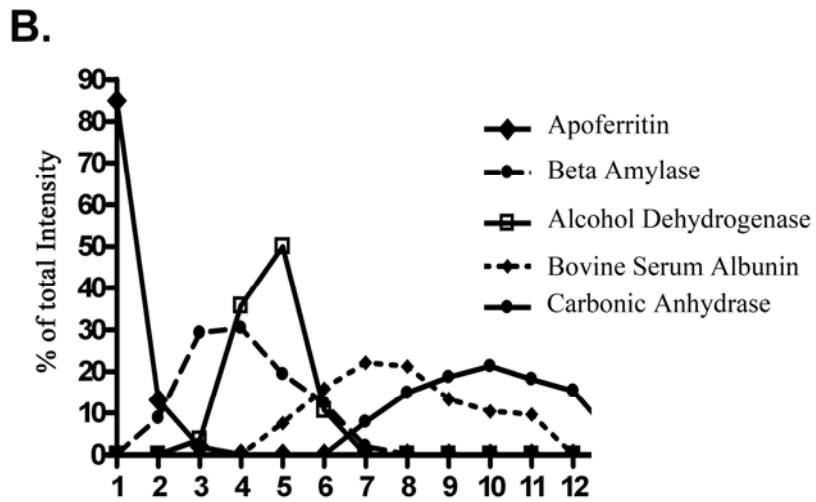

# Outer Segment Oligomerization of Rds-Supporting Information

Supplementary Figure 2  
Chakraborty et al.

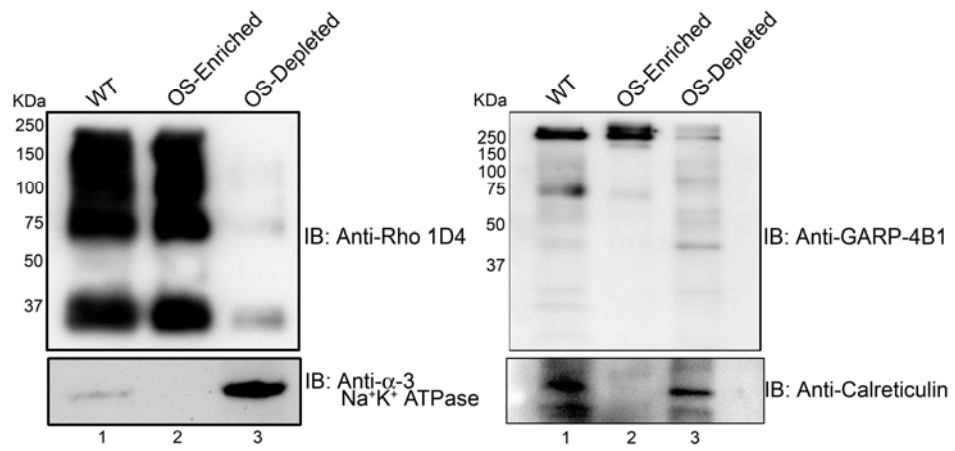

Supplement: NIHMS158352-supplement-suppl.pdf [file NIHMS158352-supplement-suppl.pdf]
